# Supplementary material for: Photophysics, aggregation and amplified quenching of a water-soluble poly(phenylene ethynylene)Electronic supplementary information (ESI) available: details regarding the synthesis and structural characterization of PPE-SO3â€“ and PE-SO3â€“. See http://www.rsc.org/suppdata/cc/b1/b109630c/
Source: Royal Society of Chemistry journal article supplement (doi:10.1039/b109630c), 2002-02-04
Supplement: b109630c.doc [file b109630c.doc]

Photophysics, Aggregation and Amplified Quenching of a Water-Soluble poly(Phenylene Ethynylene)

C. Tan, M. R. Pinto and K. S. Schanze, Supporting Information

The synthetic approaches used to obtain PPE-SO3- and PE-SO3- are outlined in Schemes 1 and 2 respectively.

**Scheme 1**

**Scheme 2**

**Starting Materials** 2,5-Diiodohydroquinone and 1,4-diethynylbenzene were synthesized according to procedures published elsewhere.1,2

**Monomer 1** 7.24 g (20.0 mmol) of 2,5-diiodohydroquinone was dissolved in a solution that contained 2.0 g (50.0 mmol) of sodium hydroxyde in 200 mL of water in a Erlenmeyer flask under argon. A solution of 6.1 g (50.0 mmol) of 1,3-propanesultone in 40 mL of dioxane was added to the former solution at once. The resulting mixture was then stirred at room temperature overnight, during which time a thick pink slurry formed. The reaction mixture was then stirred at 80-100° C for another 30 minutes and then cooled in a water/ice bath. The suspension obtained was vacuum filtered, and the retained solid was washed with cold water followed by acetone, and crystallized twice from water.

Yield 9.2 g (70 %) as a fine white powder

C12H14I2Na2O8S2 (Mol. Wt.: 650.16):

Analysis calc: C 22.17; H 2.17; I 39.04; S 9.86

Analysis found: C 22.43; H 2.57; I 34.63; S 8.96

FTIR (max. cm-1, KBr pellet): 2975, 2940, 2872, 1624, 1489, 1464, 1438, 1390, 1353, 1262, 1206, 1156, 1061, 1032, 937, 850, 795, 739, 629, 551

1H-NMR (DMSO-d6; ppm from TMS): 2.00 (t, 4H); 2.64 (t, 4H); 4.05 (t, 4H); 7.30 (s, 2H)

13C-NMR (DMSO-d6; ppm from TMS): 25.37, 48.14, 68.96, 86.99, 122.44, 152.30

**PPE-SO3-** 1.008 g (1.55 mmol) of monomer **1** and 0.189 g (1.50 mmol) of 1,4-diethynylbenzene were dissolved in a mixture of 20 mL of water and 20 mL of DMF at 60 °C in a Schlenk flask with a gentle flow of argon and with magnetic stirring. The resulting clear solution was deoxygenated by several cycles of vacuum-argon cycling. Another solution comprised of 52.0 mg (45.0 μmol) of Pd(PPh3)4 and 10.0 mg (45 μmol) of CuI in a mixture of 10 mL of diisopropylamine and 10 mL of DMF was likewise deoxygenated and was subsequently added to the former solution by means of a cannula. The final mixture was again deoxygenated by vacuum-argon cycling and was then warmed to 50-55° C and stirred under a positive pressure of argon for 14 hrs. The resulting solution was viscous, brown in color and exhibited an intense blue fluorescence when illuminated with a near-UV lamp. The solution was cooled and then slowly added to 1 L of a methanol/acetone/ether mixture (10:40:50 v:v:v). The polymer precipitated as greenish fibers. It was redissolved in 200 mL of water/methanol 70:30, treated with 0.1 g of sodium sulfide (Na2S), and then the solution was filtered through quantitative filter paper, followed by a a 10-20 μm fritted glass filter, and finally through a 0.8 μm nylon membrane. The polymer was precipitated by addition to a large volume of methanol/acetone/ether (10:40:50). The polymer was dissolved in water/methanol and reprecipitated from methanol/acetone/ether four more times. Finally, the polymer was dissolved in 150 mL of water, 0.05 g of sodium cyanide was added, and the resulting solution was dialyzed against water (Millipore NanopureTM) using a 6-8 kD MWCO cellulose membrane. After the dialysis, the polymer concentration was approximately 2.1 mg-mL. The polymer was stored in this format and diluted as appropriate for spectroscopic studies. The molecular weight of PPE-SO3- was estimated to be 100 kD based on its ultrafiltration properties and iodine end-group analysis.

Yield 535 mg (68.5%) as light yellow fibers

C22H18Na2O8S2 (Mol. Wt. monomeric unit: 520.48):

Analysis calc: C 50.77; H 3.49; S 12.32

Analysis found: C 48.98; H 4.52; I 0.12; S 8.89

FTIR (max. cm-1, cast film): 2944, 2878, 1638, 1519, 1469, 1439, 1417, 1281, 1189, 1045, 835, 612, 541

1H-NMR (DMSO-d6; ppm from TMS, 100°C): 2.15 (t, 4H); 2.77 (t, 4H); 4.21 (t, 4H); 7.18 (s, 2H); 7.61 (broad, 4H)

**PE-SO3-.** The model compound was synthesized by the same method used to synthesize PPE-SO3-, except phenylacetylene was used in place of 1,4-diethynylbenzene. The crude product was decolorized with charcoal and recrystallized three times from water.

Yield 60.9% as a pale yellow solid

C28H24Na2O8S2 (Mol. Wt.: 598.60):

calc: C 56.18; H 4.04; S 10.71

found: C 52.14; H 4.25; S 9.17

FTIR (max., KBr pellet): 2926, 2873, 1654, 1638, 1596, 1509, 1488, 1417, 1390, 1282, 1193, 1050, 858, 755, 688, 613, 542

1H-NMR (DMSO-d6; ppm from TMS): 2.06 (t, 4H); 2.66 (t, 4H); 4.13 (t, 4H); 7.14 (s, 2H); 7.43 (m, 6H); 7.56 (m, 4H)

13C-NMR (DMSO-d6; ppm from TMS): 25.43, 47.92, 68.15, 94.85, 113.20, 116.60, 122.51, 128.84, 131.35, 153.00

1. "Fluorescent Chemosensors Based on Energy Migration in Conjugated Polymers: The Molecular Wire Approach to Increased Sensitivty", Zhou, Q.; Swager, T. M.; *J. Am. Chem. Soc.* **1995**, *117*, 12593-12602.

2. "A convenient synthesis of ethynylarenes and diethynylarenes", Takahashi, S.; Kuroyama, Y.; Sonogashira, K.; Hagihara, N.; *Synthesis* **1980**, 627-630.
